# Supplementary material
Source: PubMed Central journal article supplement (PMC6049828)
Supplement: NIHMS926184-supplement-2.pdf [file NIHMS926184-supplement-2.pdf]

**Table I: Primers Used for CiA and dCas9 Recruitment Studies**

| Primers (Organism)        | Sequences                   | Orientation |
|---------------------------|-----------------------------|-------------|
| CiA:Oct4 -1485<br>(mouse) | CAGAGCATGGTGTAGGAGCA        | Sense       |
|                           | GCTGGCGGAAAGACACTAAG        | Anti-sense  |
| CiA:Oct4 -739<br>(mouse)  | GCACTTCTCTGGGGTCTCTG        | Sense       |
|                           | ACCCACCCGTCTAGAGTCCT        | Anti-sense  |
| CiA:Oct4 -309<br>(mouse)  | GAGCTTGCATGCCTGCAGGT        | Sense       |
|                           | CAGGAGGCCTTCATTTTCAA        | Anti-sense  |
| CiA:Oct4 -169<br>(mouse)  | CTAGAGGATCCGAGGACCAATTG     | Sense       |
|                           | AATCCACCCCTCTAGCCTTG        | Anti-sense  |
| CiA:Oct4 +489<br>(mouse)  | CACATGAAGCAGCACGACTT        | Sense       |
|                           | AGTTCACCTTGATGCCGTTT        | Anti-sense  |
| Rps29<br>(mouse)          | GCGCAGGCGCTCTTCAAAGTTT      | Sense       |
|                           | CTGAGAGCGACGGGGAGATACTAG    | Anti-sense  |
| Rho<br>(mouse)            | GGCATCCATCCACCAAGACCATC     | Sense       |
|                           | TCCATGTTCCCTTCCATTAATCCCTTC | Anti-sense  |
| PSMB11<br>(human)         | TGCTCCATCCATTTGTGCTCA       | Sense       |
|                           | CCCTTCATCTCAGAGGACAGC       | Anti-sense  |
| RHO<br>(human)            | GGACATCCACCAAGACCTACTGAT    | Sense       |
|                           | ATGTTCTCCCTTCCATTCATTCC     | Anti-sense  |
